# Supplementary material for: DLGAP5 Regulates the Proliferation, Migration, Invasion, and Cell Cycle of Breast Cancer Cells via the JAK2/STAT3 Signaling Axis
Source: MDPI journal article supplement (doi:10.3390/ijms242115819), 2023-10-31
Supplement: s1 [file s1]

Supplementary Table S1. Interferes with sequence information.

| Gene name               | Sequence              |                       |
|-------------------------|-----------------------|-----------------------|
|                         | Sense (5'-3')         | Antisense (5'-3')     |
| <i>DLGAP5</i> -Negative | UUCUCCGAACGUGUCACGUTT | ACGUGACACGUUCGGAGAATT |
| <i>DLGAP5</i> -si-RNA#1 | GGAGCAGACUAAGAUUGAUTT | AUCAAUCUUAGUCUGCUCCTT |
| <i>DLGAP5</i> -si-RNA#2 | CCUAUCAAGUAACACCUAUTT | AUAGGUGUUACUUGAUAGGTT |
| <i>DLGAP5</i> -si-RNA#3 | GCAAUGAGAGAGAGAAUUATT | UAAUUCUCUCUCUCAUUGCTT |

Supplementary Table S2. Primer sequence information.

| Gene name        | Primer                 | Direction | Sequence                |
|------------------|------------------------|-----------|-------------------------|
| <i>DLGAP5</i>    | H- <i>DLGAP5</i> -F    | 5'-3'     | ATTCGCACAGCAGTTGGTCA    |
|                  | H- <i>DLGAP5</i> -R    | 5'-3'     | GCATCTTCTATGCTGCTCCTGC  |
| <i>GAPDH</i>     | H- <i>GAPDH</i> -F     | 5'-3'     | GGAGCGAGATCCCTCCAAAAT   |
|                  | H- <i>GAPDH</i> -R     | 5'-3'     | GGCTGTTGTCATACTTCTCATGG |
| <i>Cyclin D1</i> | H- <i>Cyclin D1</i> -F | 5'-3'     | GTCCTACTTCAAATGTGTGCAG  |
|                  | H- <i>Cyclin D1</i> -R | 5'-3'     | GGGATGGTCTCCTTCATCTTAG  |
| <i>Ki67</i>      | H- <i>Ki67</i> -F      | 5'-3'     | ACTCTCCACAGTCAGACCCA    |
|                  | H- <i>Ki67</i> -R      | 5'-3'     | TGCACGCTAAGAGTTCTCCC    |
| <i>IL-6</i>      | H- <i>IL-6</i> -F      | 5'-3'     | TCCTTCTCCACAAGCGCC      |
|                  | H- <i>IL-6</i> -R      | 5'-3'     | GATGCCGTCGAGGATGTACC    |

Supplementary Table S3. Results of GO enrichment analysis of *DLGAP5* related genes.

| Type | Term                                                                               | Count | PValue    | Fold Enrichment | Bonferroni | Benjamini | FDR       |
|------|------------------------------------------------------------------------------------|-------|-----------|-----------------|------------|-----------|-----------|
| MF   | GO:0005515-protein binding                                                         | 276   | 7.22E-29  | 1.40            | 2.83E-26   | 2.83E-26  | 2.44E-26  |
| MF   | GO:0019901-protein kinase binding                                                  | 47    | 4.27E-22  | 5.84            | 1.67E-19   | 8.37E-20  | 7.22E-20  |
| MF   | GO:0016538-cyclin-dependent protein serine/threonine kinase regulator activity     | 17    | 1.86E-21  | 35.16           | 7.28E-19   | 2.43E-19  | 2.09E-19  |
| MF   | GO:0008017-microtubule binding                                                     | 34    | 1.21E-20  | 8.32            | 4.74E-18   | 1.19E-18  | 1.02E-18  |
| MF   | GO:0005524-ATP binding                                                             | 77    | 2.74E-20  | 3.21            | 1.07E-17   | 2.15E-18  | 1.85E-18  |
| MF   | GO:0003777-microtubule motor activity                                              | 17    | 6.01E-16  | 18.17           | 2.18E-13   | 3.93E-14  | 3.39E-14  |
| MF   | GO:0003682-chromatin binding                                                       | 35    | 7.29E-14  | 4.80            | 2.86E-11   | 4.08E-12  | 3.52E-12  |
| MF   | GO:0017056-structural constituent of nuclear pore                                  | 12    | 2.87E-13  | 26.53           | 1.12E-10   | 1.41E-11  | 1.21E-11  |
| MF   | GO:0004712-protein serine/threonine/tyrosine kinase activity                       | 32    | 2.34E-12  | 4.66            | 9.17E-10   | 1.02E-10  | 8.78E-11  |
| MF   | GO:0004674-protein serine/threonine kinase activity                                | 30    | 5.15E-12  | 4.84            | 2.02E-09   | 2.02E-10  | 1.74E-10  |
| CC   | GO:0005654-nucleoplasm                                                             | 209   | 7.77E-83  | 3.67            | 2.69E-80   | 2.69E-80  | 2.04E-80  |
| CC   | GO:0005634-nucleus                                                                 | 218   | 7.10E-57  | 2.53            | 2.45E-54   | 1.23E-54  | 9.29E-55  |
| CC   | GO:0005829-cytosol                                                                 | 204   | 7.38E-52  | 2.57            | 2.55E-49   | 8.51E-50  | 6.44E-50  |
| CC   | GO:0000776-kinetochore                                                             | 40    | 1.49E-37  | 17.95           | 5.16E-35   | 1.29E-35  | 9.77E-36  |
| CC   | GO:0005813-centrosome                                                              | 60    | 3.48E-34  | 7.48            | 1.20E-31   | 2.41E-32  | 1.82E-32  |
| CC   | GO:0005819-spindle                                                                 | 34    | 4.13E-30  | 16.09           | 1.43E-27   | 2.38E-28  | 1.80E-28  |
| CC   | GO:0005680-anaphase-promoting complex                                              | 19    | 1.21E-29  | 57.45           | 4.19E-27   | 5.98E-28  | 4.53E-28  |
| CC   | GO:0000775-chromosome, centromeric region                                          | 25    | 3.21E-28  | 27.17           | 1.11E-25   | 1.39E-26  | 1.05E-26  |
| CC   | GO:0072686-mitotic spindle                                                         | 32    | 3.84E-28  | 15.90           | 1.33E-25   | 1.48E-26  | 1.12E-26  |
| CC   | GO:0005694-chromosome                                                              | 39    | 1.40E-27  | 10.64           | 4.85E-25   | 4.85E-26  | 3.67E-26  |
| BP   | GO:0051301-cell division                                                           | 119   | 5.01E-126 | 20.15           | 9.64E-123  | 9.64E-123 | 8.79E-123 |
| BP   | GO:0007049-cell cycle                                                              | 59    | 1.17E-42  | 10.77           | 2.24E-39   | 1.12E-39  | 1.02E-39  |
| BP   | GO:0000278-mitotic cell cycle                                                      | 42    | 3.12E-40  | 18.50           | 6.00E-37   | 2.00E-37  | 1.82E-37  |
| BP   | GO:0000079-regulation of cyclin-dependent protein serine/threonine kinase activity | 27    | 4.85E-33  | 32.00           | 9.34E-30   | 2.33E-30  | 2.13E-30  |

|    |                                                 |    |          |       |          |          |          |
|----|-------------------------------------------------|----|----------|-------|----------|----------|----------|
| BP | GO:0007346-regulation of mitotic cell cycle     | 28 | 2.43E-32 | 28.08 | 4.68E-29 | 9.36E-30 | 8.53E-30 |
| BP | GO:0007059-chromosome segregation               | 27 | 3.43E-28 | 22.56 | 6.60E-25 | 1.10E-25 | 1.00E-25 |
| BP | GO:0000070-mitotic sister chromatid segregation | 21 | 1.49E-27 | 38.02 | 2.86E-24 | 4.08E-25 | 3.72E-25 |
| BP | GO:0051445-regulation of meiotic cell cycle     | 17 | 2.72E-26 | 55.40 | 5.23E-23 | 6.54E-24 | 5.96E-24 |
| BP | GO:0007052-mitotic spindle organization         | 23 | 1.10E-25 | 26.30 | 2.11E-22 | 2.35E-23 | 2.14E-23 |
| BP | GO:0007094-mitotic spindle assembly checkpoint  | 18 | 3.92E-23 | 36.66 | 7.54E-20 | 7.54E-21 | 6.87E-21 |

Supplementary Table S4. Enrichment results of KEGG pathway of *DLGAP5* related genes.

| Term                                             | Count | PValue    | Fold Enrichment | Bonferroni | Benjamini | FDR       |
|--------------------------------------------------|-------|-----------|-----------------|------------|-----------|-----------|
| hsa04110:Cell cycle                              | 86    | 1.23E-114 | 28.49           | 2.68E-112  | 2.68E-112 | 2.05E-112 |
| hsa04114:Oocyte meiosis                          | 45    | 4.70E-40  | 14.45           | 1.02E-37   | 5.10E-38  | 3.90E-38  |
| hsa04914:Progesterone-mediated oocyte maturation | 39    | 1.50E-36  | 16.09           | 3.25E-34   | 1.08E-34  | 8.29E-35  |
| hsa05166:Human T-cell leukemia virus 1 infection | 48    | 1.48E-32  | 9.10            | 3.21E-30   | 8.04E-31  | 6.15E-31  |
| hsa04218:Cellular senescence                     | 40    | 6.57E-30  | 10.79           | 1.43E-27   | 2.85E-28  | 2.18E-28  |
| hsa04115:p53 signaling pathway                   | 23    | 4.30E-19  | 13.26           | 9.34E-17   | 1.56E-17  | 1.19E-17  |
| hsa05203:Viral carcinogenesis                    | 34    | 5.05E-19  | 7.01            | 1.10E-16   | 1.57E-17  | 1.20E-17  |
| hsa03013:Nucleocytoplasmic transport             | 24    | 3.13E-16  | 9.35            | 7.23E-14   | 8.49E-15  | 6.49E-15  |
| hsa04120:Ubiquitin mediated proteolysis          | 25    | 1.86E-14  | 7.41            | 4.02E-12   | 4.48E-13  | 3.43E-13  |
| hsa05220:Chronic myeloid leukemia                | 19    | 9.13E-14  | 10.52           | 1.98E-11   | 1.98E-12  | 1.52E-12  |
| hsa05222:Small cell lung cancer                  | 20    | 2.64E-13  | 9.15            | 5.73E-11   | 5.21E-12  | 3.98E-12  |
| hsa05200:Pathways in cancer                      | 42    | 7.36E-12  | 3.33            | 1.60E-09   | 1.33E-10  | 1.02E-10  |
| hsa05169:Epstein-Barr virus infection            | 24    | 3.03E-10  | 5.00            | 6.57E-08   | 5.05E-09  | 3.86E-09  |
| hsa03030:DNA replication                         | 12    | 3.49E-10  | 14.03           | 7.57E-08   | 5.41E-09  | 4.14E-09  |
| hsa05223:Non-small cell lung cancer              | 15    | 9.58E-10  | 8.77            | 2.08E-07   | 1.39E-08  | 1.06E-08  |

|                                                        |    |          |       |          |          |          |
|--------------------------------------------------------|----|----------|-------|----------|----------|----------|
| hsa04068:FoxO signaling pathway                        | 18 | 9.88E-09 | 5.78  | 2.14E-06 | 1.34E-07 | 1.02E-07 |
| hsa05165:Human papillomavirus infection                | 28 | 1.41E-08 | 3.56  | 3.05E-06 | 1.80E-07 | 1.37E-07 |
| hsa05219:Bladder cancer                                | 11 | 2.57E-08 | 11.29 | 5.57E-06 | 3.09E-07 | 2.37E-07 |
| hsa05215:Prostate cancer                               | 15 | 5.34E-08 | 6.51  | 1.16E-05 | 6.10E-07 | 4.67E-07 |
| hsa01522:Endocrine resistance                          | 15 | 6.10E-08 | 6.44  | 1.32E-05 | 6.62E-07 | 5.06E-07 |
| hsa05218:Melanoma                                      | 13 | 9.65E-08 | 7.60  | 2.09E-05 | 9.97E-07 | 7.62E-07 |
| hsa05214:Glioma                                        | 13 | 1.54E-07 | 7.29  | 3.34E-05 | 1.52E-06 | 1.16E-06 |
| hsa05212:Pancreatic cancer                             | 13 | 1.79E-07 | 7.20  | 3.89E-05 | 1.69E-06 | 1.29E-06 |
| hsa05161:Hepatitis B                                   | 18 | 2.38E-07 | 4.68  | 5.17E-05 | 2.15E-06 | 1.65E-06 |
| hsa05226:Gastric cancer                                | 17 | 3.99E-07 | 4.80  | 8.66E-05 | 3.46E-06 | 2.65E-06 |
| hsa05207:Chemical carcinogenesis - receptor activation | 20 | 5.45E-07 | 3.97  | 1.18E-04 | 4.54E-06 | 3.48E-06 |
| hsa05162:Measles                                       | 16 | 8.76E-07 | 4.84  | 1.90E-04 | 7.04E-06 | 5.38E-06 |
| hsa05206:MicroRNAs in cancer                           | 24 | 9.90E-07 | 3.26  | 2.15E-04 | 7.67E-06 | 5.87E-06 |
| hsa05224:Breast cancer                                 | 16 | 1.79E-06 | 4.58  | 3.89E-04 | 1.31E-05 | 1.00E-05 |
| hsa05216:Thyroid cancer                                | 9  | 1.81E-06 | 10.23 | 3.93E-04 | 1.31E-05 | 1.00E-05 |
| hsa05213:Endometrial cancer                            | 10 | 7.50E-06 | 7.25  | 0.001627 | 5.25E-05 | 4.02E-05 |
| hsa04934:Cushing syndrome                              | 15 | 1.66E-05 | 4.07  | 0.003596 | 1.13E-04 | 8.61E-05 |
| hsa04919:Thyroid hormone signaling pathway             | 13 | 2.67E-05 | 4.52  | 0.005775 | 1.76E-04 | 1.34E-04 |
| hsa05210:Colorectal cancer                             | 11 | 3.22E-05 | 5.38  | 0.006959 | 2.05E-04 | 1.57E-04 |
| hsa04340:Hedgehog signaling pathway                    | 9  | 4.54E-05 | 6.76  | 0.009804 | 2.81E-04 | 2.15E-04 |
| hsa05202:Transcriptional misregulation in cancer       | 16 | 4.90E-05 | 3.49  | 0.010572 | 2.95E-04 | 2.26E-04 |
| hsa05163:Human cytomegalovirus infection               | 17 | 7.97E-05 | 3.18  | 0.01715  | 4.68E-04 | 3.58E-04 |
| hsa05160:Hepatitis C                                   | 14 | 8.30E-05 | 3.75  | 0.017858 | 4.74E-04 | 3.63E-04 |
| hsa03420:Nucleotide excision repair                    | 8  | 1.05E-04 | 7.16  | 0.022447 | 5.82E-04 | 4.45E-04 |
| hsa05225:Hepatocellular carcinoma                      | 14 | 1.64E-04 | 3.51  | 0.035067 | 8.86E-04 | 6.78E-04 |
| hsa04012:ErbB signaling pathway                        | 10 | 1.67E-04 | 4.95  | 0.035685 | 8.86E-04 | 6.78E-04 |

|                                                          |    |          |      |          |          |          |
|----------------------------------------------------------|----|----------|------|----------|----------|----------|
| hsa04151:PI3K-Akt signaling pathway                      | 21 | 2.54E-04 | 2.50 | 0.053703 | 0.001314 | 0.001005 |
| hsa05205:Proteoglycans in cancer                         | 15 | 3.43E-04 | 3.08 | 0.071685 | 0.00173  | 0.001323 |
| hsa05167:Kaposi sarcoma-associated herpesvirus infection | 14 | 6.67E-04 | 3.04 | 0.134721 | 0.003227 | 0.002468 |
| hsa05217:Basal cell carcinoma                            | 8  | 6.69E-04 | 5.34 | 0.135192 | 0.003227 | 0.002468 |
| hsa05221:Acute myeloid leukemia                          | 8  | 9.71E-04 | 5.02 | 0.190145 | 0.004583 | 0.003506 |
| hsa04917:Prolactin signaling pathway                     | 8  | 0.001262 | 4.81 | 0.239635 | 0.005825 | 0.004456 |
| hsa04210:Apoptosis                                       | 11 | 0.001392 | 3.40 | 0.260804 | 0.006291 | 0.004813 |
| hsa03430:Mismatch repair                                 | 5  | 0.001886 | 9.15 | 0.336092 | 0.008352 | 0.006389 |
| hsa05014:Amyotrophic lateral sclerosis                   | 19 | 0.002381 | 2.20 | 0.403907 | 0.010335 | 0.007906 |
| hsa03250:Viral life cycle - HIV-1                        | 7  | 0.003588 | 4.68 | 0.541563 | 0.015265 | 0.011678 |
| hsa04390:Hippo signaling pathway                         | 11 | 0.003999 | 2.95 | 0.580871 | 0.016689 | 0.012767 |
| hsa04540:Gap junction                                    | 8  | 0.00468  | 3.83 | 0.638701 | 0.019163 | 0.01466  |
| hsa01524:Platinum drug resistance                        | 7  | 0.007404 | 4.03 | 0.800638 | 0.029753 | 0.02276  |
| hsa05170:Human immunodeficiency virus 1 infection        | 12 | 0.011589 | 2.38 | 0.920309 | 0.045726 | 0.034979 |
| hsa04310:Wnt signaling pathway                           | 10 | 0.019223 | 2.48 | 0.985182 | 0.074487 | 0.056981 |
| hsa05164:Influenza A                                     | 10 | 0.019885 | 2.46 | 0.987202 | 0.075701 | 0.05791  |
| hsa04010:MAPK signaling pathway                          | 14 | 0.022014 | 2.00 | 0.992017 | 0.082364 | 0.063007 |
| hsa04935:Growth hormone synthesis, secretion and action  | 8  | 0.023426 | 2.81 | 0.994165 | 0.086158 | 0.065909 |
| hsa04350:TGF-beta signaling pathway                      | 7  | 0.02475  | 3.10 | 0.995654 | 0.089514 | 0.068476 |
| hsa05034:Alcoholism                                      | 10 | 0.033043 | 2.25 | 0.999319 | 0.117546 | 0.08992  |
| hsa04728:Dopaminergic synapse                            | 8  | 0.036758 | 2.55 | 0.999704 | 0.128653 | 0.098417 |
| hsa04062:Chemokine signaling pathway                     | 10 | 0.038024 | 2.19 | 0.999778 | 0.130971 | 0.10019  |
| hsa03410:Base excision repair                            | 4  | 0.042239 | 5.10 | 0.999914 | 0.143177 | 0.109527 |
| hsa04630:JAK-STAT signaling pathway                      | 9  | 0.043006 | 2.28 | 0.999928 | 0.143177 | 0.109527 |
| hsa04910:Insulin signaling pathway                       | 8  | 0.043547 | 2.46 | 0.999936 | 0.143177 | 0.109527 |
| hsa05418:Fluid shear stress and atherosclerosis          | 8  | 0.046475 | 2.42 | 0.999967 | 0.148929 | 0.113927 |

|                                                               |   |          |      |          |          |          |
|---------------------------------------------------------------|---|----------|------|----------|----------|----------|
| hsa04530:Tight junction                                       | 9 | 0.046669 | 2.24 | 0.999969 | 0.148929 | 0.113927 |
| hsa04213:Longevity regulating pathway - multiple species      | 5 | 0.058505 | 3.39 | 0.999998 | 0.183994 | 0.140751 |
| hsa03440:Homologous recombination                             | 4 | 0.072078 | 4.11 | 1        | 0.221394 | 0.169361 |
| hsa04921:Oxytocin signaling pathway                           | 8 | 0.072438 | 2.19 | 1        | 0.221394 | 0.169361 |
| hsa04720:Long-term potentiation                               | 5 | 0.073538 | 3.14 | 1        | 0.221636 | 0.169547 |
| hsa05031:Amphetamine addiction                                | 5 | 0.080051 | 3.05 | 1        | 0.237959 | 0.182033 |
| hsa04926:Relaxin signaling pathway                            | 7 | 0.085001 | 2.28 | 1        | 0.246366 | 0.188464 |
| hsa04962:Vasopressin-regulated water reabsorption             | 4 | 0.08515  | 3.83 | 1        | 0.246366 | 0.188464 |
| hsa04933:AGE-RAGE signaling pathway in diabetic complications | 6 | 0.087817 | 2.52 | 1        | 0.250741 | 0.191811 |
| hsa04064:NF-kappa B signaling pathway                         | 6 | 0.099701 | 2.43 | 1        | 0.277374 | 0.212185 |
| hsa04660:T cell receptor signaling pathway                    | 6 | 0.099701 | 2.43 | 1        | 0.277374 | 0.212185 |

Supplementary Table S5. Gene list of JAK-STAT pathway.

| KEGG pathway name | Gene list                                                                                                                                                                                                                                                                                                                                                                                                                                                                                                                                                                                                                                                                                                                                                                                                                                                                                                                                                                                                    |
|-------------------|--------------------------------------------------------------------------------------------------------------------------------------------------------------------------------------------------------------------------------------------------------------------------------------------------------------------------------------------------------------------------------------------------------------------------------------------------------------------------------------------------------------------------------------------------------------------------------------------------------------------------------------------------------------------------------------------------------------------------------------------------------------------------------------------------------------------------------------------------------------------------------------------------------------------------------------------------------------------------------------------------------------|
| Cell cycle        | <p><i>IL2, IL4, IL7, IL9, IL15, IL21, TSLP, IL2RA, IL2RB, IL2RG, IL4R, IL7R, IL9R, IL15RA, IL21R, CRLF2, IL3, IL5, CSF2, IL3RA, IL5RA, CSF2RA, CSF2RB, IL6, IL11, IL13, IL31, OSM, LIF, CNTF, CTF1, CLCF1, IL6R, IL6ST, IL11RA, IL13RA1, IL13RA2, IL27RA, IL31RA, OSMR, LIFR, CNTFR, IL10, IL19, IL22, IL20, IL24, IL26, IL10RA, IL10RB, IL20RA, IL20RB, IL22RA1, IL22RA2, IL12A, IL12B, IL23A, IL12RB1, IL12RB2, IL23R, EPO, GH1,PRL, THPO, CSF3, LEP, C19orf43, EPOR, GHR, PRLR, MPL, CSF3R, LEPR, IFNA7, IFNB1, IFNE, IFNK, IFNL1, IFNW1, IFNAR1, IFNAR2, IFNLR1, IFNG, IFNGR1, IFNGR2, EGF, PDGFA, PDGFB, EGFR, PDGFRA, PDGFRB, JAK1, JAK2, JAK3, TYK2, STAT1, STAT2, STAT3, STAT4, STAT5A, STAT5B, STAT6, IRF9, CISH, SOCS1, SOCS2, SOCS3, SOCS4, SOCS5, BCL2, BCL2L1, MYC, CCND1, CCND2, CCND3, CDKN1A, AOX1, GFAPSTAM2, PTPN2, PTPN6, PIAS1, PIAS2, PIAS3, PIAS4, FHL1, PTPN11, GRB2, SOS2, HRAS, IL27A, CTF2, DOME, IL28, SOCS6_7, MCL1, PIM1, KAT3, RAF1, PIK3CA_B_D, PIK3R1_2_3, AKT, MTOR</i></p> |

Supplementary Table S6 JAK-STAT pathway-related genes significantly correlated with *DLGAP5*  
 $(|R| > 0.3, P < 0.05)$

| Gene          | Gene           | Cor   | P        |
|---------------|----------------|-------|----------|
| <i>DLGAP5</i> | <i>IL21</i>    | 0.34  | 1.31E-32 |
| <i>DLGAP5</i> | <i>TSLP</i>    | -0.30 | 8.70E-26 |
| <i>DLGAP5</i> | <i>IL2RA</i>   | 0.36  | 1.43E-36 |
| <i>DLGAP5</i> | <i>IL21R</i>   | 0.43  | 2.20E-16 |
| <i>DLGAP5</i> | <i>CTF1</i>    | -0.31 | 1.02E-27 |
| <i>DLGAP5</i> | <i>IL12RB2</i> | 0.30  | 5.97E-26 |
| <i>DLGAP5</i> | <i>IFNB1</i>   | 0.34  | 1.19E-32 |
| <i>DLGAP5</i> | <i>IFNL1</i>   | 0.39  | 9.24E-43 |
| <i>DLGAP5</i> | <i>STAT1</i>   | 0.51  | 1.72E-77 |
| <i>DLGAP5</i> | <i>SOCS2</i>   | -0.33 | 8.38E-30 |
| <i>DLGAP5</i> | <i>SOCS4</i>   | 0.36  | 2.59E-36 |
| <i>DLGAP5</i> | <i>GFAP</i>    | -0.37 | 2.42E-38 |
| <i>DLGAP5</i> | <i>PTPN2</i>   | 0.39  | 2.05E-43 |
| <i>DLGAP5</i> | <i>FHL1</i>    | -0.31 | 5.89E-27 |
| <i>DLGAP5</i> | <i>GRB2</i>    | 0.36  | 1.80E-35 |
| <i>DLGAP5</i> | <i>RAF1</i>    | 0.39  | 4.93E-42 |
